# Supplementary material
Source: publisher figshare collection journal article supplement (https://acs.figshare.com/ndownloader/files/21732441)
Supplement: Supplementary file 1 [file 21732441]

## Sheet: init
	Legacy and emerging Persistent Organic Pollutants in Antarctic benthic invertebrates near Rothera Point, Western Antarctic Peninsula.
	Artem Krasnobaev 1, Guillaume ten Dam2,3, Rita Boerrigter-Eenling2, Fang Peng4, Stefan P.J. van Leeuwen2, Simon A. Morley5, Lloyd S. Peck5, Nico W. van den Brink1*.
	1 Wageningen University, Dep. Toxicology, PO Box 8000, NL 6700 EA Wageningen, the Netherlands.
	2 Wageningen Food Safety Research (WFSR), Wageningen Research, PO Box 230, NL 6700 AE Wageningen, the Netherlands.
	3 DSP-systems, Food Valley BTA12, Darwinstraat 7a, 6718 XR Ede, The Netherlands.
	4 Luxembourg Institute of Health, rue Thomas Edison 1A-B, 1445 Strassen, Luxembourg.
	5 British Antarctic Survey, Natural Environment Research Council (NERC), Cambridge, the UK.
	* corresponding author. Address: sub-division of Toxicology. Postbus 8000, 6700 EA Wageningen, The Netherlands. E-mail: nico.vandenbrink@wur.nl
	Appendix 4B. Concentration of PBDEs in individual samples
	All data is presented in pg/g lw (pictogram per gram sample lipid weight)
	"I" indicates samples taken at the site "Islands"
	"S" indicates samples taken at the site "Station"

## Sheet: Cucumbers (I)
	SCF28	SCF27	SCF26	SCF24	SCF22	SCF25	SCF18	SCF16	SCF17
BDE-17	<LOQ	<LOQ	<LOQ	<LOQ	<LOQ	<LOQ	<LOQ	<LOQ	<LOQ
BDE-28	<LOQ	<LOQ	<LOQ	<LOQ	<LOQ	<LOQ	<LOQ	<LOQ	<LOQ
BDE-75	<LOQ	<LOQ	<LOQ	<LOQ	<LOQ	<LOQ	<LOQ	<LOQ	<LOQ
BDE-49	<LOQ	<LOQ	<LOQ	<LOQ	52.1163	<LOQ	<LOQ	<LOQ	<LOQ
BDE-71	<LOQ	<LOQ	<LOQ	<LOQ	<LOQ	<LOQ	<LOQ	<LOQ	<LOQ
BDE-47	<LOQ	<LOQ	<LOQ	<LOQ	187.722	<LOQ	<LOQ	<LOQ	<LOQ
BDE-66	<LOQ	<LOQ	<LOQ	<LOQ	<LOQ	<LOQ	<LOQ	<LOQ	<LOQ
BDE-77	<LOQ	<LOQ	<LOQ	<LOQ	<LOQ	<LOQ	<LOQ	<LOQ	<LOQ
BDE-100	<LOQ	<LOQ	<LOQ	<LOQ	<LOQ	<LOQ	<LOQ	<LOQ	<LOQ
BDE-119	18.9083	<LOQ	24.8585	<LOQ	29.0227	<LOQ	<LOQ	<LOQ	<LOQ
BDE-99	<LOQ	<LOQ	<LOQ	<LOQ	<LOQ	<LOQ	<LOQ	<LOQ	<LOQ
BDE-85	<LOQ	<LOQ	<LOQ	<LOQ	<LOQ	<LOQ	<LOQ	<LOQ	<LOQ
BDE-154	<LOQ	<LOQ	<LOQ	<LOQ	<LOQ	<LOQ	<LOQ	26.2861	6.65944
BDE-153	<LOQ	<LOQ	<LOQ	<LOQ	<LOQ	<LOQ	<LOQ	<LOQ	<LOQ
BDE-138	<LOQ	<LOQ	<LOQ	<LOQ	<LOQ	<LOQ	<LOQ	<LOQ	<LOQ
BDE-183	<LOQ	<LOQ	<LOQ	<LOQ	<LOQ	<LOQ	<LOQ	<LOQ	15.7532
BDE-190	<LOQ	<LOQ	<LOQ	<LOQ	<LOQ	<LOQ	<LOQ	<LOQ	<LOQ
BDE-209	3401.34	549.293	216.094	8571.87	576.202	3490.19	424.969	3423.11	1768.45

## Sheet: Cucumbers(S)
	SCF19	SCF10	SCF9	SCF23	SCF20	SCF1	SCF2
BDE-17	<LOQ	<LOQ	<LOQ	<LOQ	<LOQ	<LOQ	<LOQ
BDE-28	<LOQ	<LOQ	<LOQ	<LOQ	<LOQ	<LOQ	<LOQ
BDE-75	<LOQ	<LOQ	<LOQ	<LOQ	<LOQ	<LOQ	<LOQ
BDE-49	<LOQ	<LOQ	<LOQ	<LOQ	<LOQ	<LOQ	<LOQ
BDE-71	<LOQ	<LOQ	<LOQ	<LOQ	<LOQ	9.30934	0.840222
BDE-47	<LOQ	<LOQ	<LOQ	<LOQ	<LOQ	<LOQ	<LOQ
BDE-66	<LOQ	<LOQ	<LOQ	<LOQ	<LOQ	<LOQ	<LOQ
BDE-77	<LOQ	<LOQ	<LOQ	<LOQ	<LOQ	<LOQ	<LOQ
BDE-100	<LOQ	<LOQ	<LOQ	<LOQ	<LOQ	<LOQ	<LOQ
BDE-119	19.3349	<LOQ	<LOQ	53.8285	20.7025	<LOQ	<LOQ
BDE-99	<LOQ	<LOQ	<LOQ	<LOQ	<LOQ	<LOQ	<LOQ
BDE-85	<LOQ	<LOQ	<LOQ	<LOQ	<LOQ	<LOQ	<LOQ
BDE-154	<LOQ	<LOQ	<LOQ	<LOQ	<LOQ	<LOQ	<LOQ
BDE-153	<LOQ	<LOQ	<LOQ	<LOQ	<LOQ	<LOQ	<LOQ
BDE-138	<LOQ	<LOQ	<LOQ	<LOQ	<LOQ	<LOQ	<LOQ
BDE-183	<LOQ	<LOQ	<LOQ	<LOQ	<LOQ	<LOQ	35.7071
BDE-190	<LOQ	<LOQ	<LOQ	<LOQ	<LOQ	<LOQ	<LOQ
BDE-209	420.561	<LOQ	131.611	1327.02	967.455	123.123	799.7

## Sheet: Squirts(I)
	A14	A9	A28	A27	A20	A26	A25	A24	A23	A28	A27	A11	A12	A8	A7	A9	A10	A13
BDE-17	<LOQ	<LOQ	36.3962	31.406	<LOQ	<LOQ	<LOQ	<LOQ	<LOQ	<LOQ	<LOQ	<LOQ	<LOQ	<LOQ	<LOQ	<LOQ	<LOQ	<LOQ
BDE-28	<LOQ	<LOQ	<LOQ	<LOQ	<LOQ	<LOQ	<LOQ	<LOQ	<LOQ	<LOQ	<LOQ	<LOQ	<LOQ	45.4757	<LOQ	<LOQ	<LOQ	<LOQ
BDE-75	<LOQ	<LOQ	<LOQ	<LOQ	<LOQ	<LOQ	<LOQ	<LOQ	<LOQ	<LOQ	<LOQ	<LOQ	<LOQ	<LOQ	<LOQ	<LOQ	<LOQ	<LOQ
BDE-49	<LOQ	<LOQ	<LOQ	<LOQ	<LOQ	<LOQ	<LOQ	<LOQ	<LOQ	<LOQ	<LOQ	<LOQ	<LOQ	<LOQ	<LOQ	<LOQ	<LOQ	<LOQ
BDE-71	<LOQ	<LOQ	<LOQ	<LOQ	<LOQ	<LOQ	<LOQ	<LOQ	<LOQ	<LOQ	<LOQ	<LOQ	<LOQ	<LOQ	<LOQ	<LOQ	<LOQ	<LOQ
BDE-47	<LOQ	<LOQ	<LOQ	<LOQ	<LOQ	<LOQ	<LOQ	<LOQ	<LOQ	<LOQ	<LOQ	<LOQ	<LOQ	<LOQ	<LOQ	<LOQ	<LOQ	<LOQ
BDE-66	<LOQ	<LOQ	<LOQ	<LOQ	<LOQ	<LOQ	<LOQ	<LOQ	<LOQ	<LOQ	<LOQ	<LOQ	<LOQ	<LOQ	<LOQ	<LOQ	<LOQ	<LOQ
BDE-77	<LOQ	<LOQ	<LOQ	<LOQ	<LOQ	<LOQ	<LOQ	<LOQ	<LOQ	<LOQ	<LOQ	<LOQ	<LOQ	<LOQ	<LOQ	<LOQ	<LOQ	<LOQ
BDE-100	<LOQ	<LOQ	<LOQ	<LOQ	<LOQ	<LOQ	<LOQ	<LOQ	<LOQ	<LOQ	<LOQ	<LOQ	<LOQ	<LOQ	<LOQ	<LOQ	<LOQ	<LOQ
BDE-119	<LOQ	<LOQ	<LOQ	<LOQ	<LOQ	<LOQ	<LOQ	<LOQ	<LOQ	<LOQ	<LOQ	<LOQ	<LOQ	<LOQ	<LOQ	<LOQ	<LOQ	<LOQ
BDE-99	<LOQ	<LOQ	<LOQ	<LOQ	<LOQ	<LOQ	<LOQ	<LOQ	<LOQ	<LOQ	<LOQ	<LOQ	<LOQ	<LOQ	<LOQ	<LOQ	<LOQ	<LOQ
BDE-85	<LOQ	<LOQ	<LOQ	<LOQ	<LOQ	<LOQ	<LOQ	<LOQ	<LOQ	<LOQ	<LOQ	<LOQ	<LOQ	<LOQ	<LOQ	<LOQ	<LOQ	<LOQ
BDE-154	<LOQ	<LOQ	<LOQ	<LOQ	<LOQ	<LOQ	<LOQ	<LOQ	<LOQ	<LOQ	<LOQ	<LOQ	<LOQ	<LOQ	<LOQ	<LOQ	<LOQ	<LOQ
BDE-153	<LOQ	<LOQ	<LOQ	<LOQ	<LOQ	<LOQ	<LOQ	<LOQ	<LOQ	<LOQ	<LOQ	<LOQ	<LOQ	<LOQ	<LOQ	<LOQ	<LOQ	<LOQ
BDE-138	<LOQ	<LOQ	<LOQ	<LOQ	<LOQ	<LOQ	<LOQ	<LOQ	<LOQ	<LOQ	<LOQ	<LOQ	<LOQ	<LOQ	<LOQ	<LOQ	<LOQ	<LOQ
BDE-183	<LOQ	<LOQ	<LOQ	<LOQ	<LOQ	<LOQ	<LOQ	<LOQ	<LOQ	<LOQ	<LOQ	<LOQ	<LOQ	<LOQ	47.5333	<LOQ	<LOQ	<LOQ
BDE-190	<LOQ	<LOQ	<LOQ	<LOQ	<LOQ	<LOQ	<LOQ	<LOQ	<LOQ	<LOQ	<LOQ	<LOQ	<LOQ	<LOQ	<LOQ	<LOQ	<LOQ	<LOQ
BDE-209	<LOQ	6708	10670.3	2200.99	<LOQ	4073.32	161.978	677.867	2045.79	239.776	238.196	11859.6	<LOQ	870.739	1370.65	352.682	<LOQ	152.268

## Sheet: Squirts(S)
	A16	A2	A1	A21	A22
BDE-17	<LOQ	<LOQ	<LOQ	<LOQ	<LOQ
BDE-28	<LOQ	<LOQ	<LOQ	<LOQ	<LOQ
BDE-75	<LOQ	<LOQ	<LOQ	<LOQ	<LOQ
BDE-49	<LOQ	<LOQ	<LOQ	<LOQ	<LOQ
BDE-71	<LOQ	<LOQ	<LOQ	<LOQ	<LOQ
BDE-47	<LOQ	<LOQ	<LOQ	<LOQ	<LOQ
BDE-66	<LOQ	<LOQ	<LOQ	<LOQ	<LOQ
BDE-77	<LOQ	<LOQ	<LOQ	<LOQ	<LOQ
BDE-100	<LOQ	<LOQ	<LOQ	<LOQ	<LOQ
BDE-119	<LOQ	<LOQ	<LOQ	<LOQ	<LOQ
BDE-99	<LOQ	<LOQ	<LOQ	<LOQ	<LOQ
BDE-85	<LOQ	<LOQ	<LOQ	<LOQ	<LOQ
BDE-154	<LOQ	<LOQ	<LOQ	<LOQ	<LOQ
BDE-153	<LOQ	<LOQ	<LOQ	<LOQ	<LOQ
BDE-138	<LOQ	<LOQ	<LOQ	<LOQ	<LOQ
BDE-183	<LOQ	<LOQ	<LOQ	<LOQ	<LOQ
BDE-190	<LOQ	<LOQ	<LOQ	<LOQ	<LOQ
BDE-209	<LOQ	<LOQ	<LOQ	803.299	3831.07

## Sheet: Stars(I)
	SST6	SST5	SST4	SST3	SST8
BDE-17	<LOQ	<LOQ	<LOQ	<LOQ	<LOQ
BDE-28	<LOQ	<LOQ	<LOQ	<LOQ	<LOQ
BDE-75	<LOQ	<LOQ	<LOQ	<LOQ	<LOQ
BDE-49	<LOQ	<LOQ	<LOQ	<LOQ	<LOQ
BDE-71	<LOQ	<LOQ	<LOQ	<LOQ	<LOQ
BDE-47	<LOQ	<LOQ	<LOQ	<LOQ	<LOQ
BDE-66	<LOQ	<LOQ	<LOQ	<LOQ	<LOQ
BDE-77	<LOQ	<LOQ	<LOQ	<LOQ	<LOQ
BDE-100	<LOQ	<LOQ	<LOQ	<LOQ	<LOQ
BDE-119	<LOQ	<LOQ	<LOQ	<LOQ	<LOQ
BDE-99	<LOQ	<LOQ	<LOQ	<LOQ	<LOQ
BDE-85	<LOQ	<LOQ	<LOQ	<LOQ	<LOQ
BDE-154	<LOQ	<LOQ	<LOQ	<LOQ	<LOQ
BDE-153	<LOQ	<LOQ	<LOQ	<LOQ	<LOQ
BDE-138	<LOQ	<LOQ	<LOQ	<LOQ	<LOQ
BDE-183	<LOQ	<LOQ	<LOQ	<LOQ	<LOQ
BDE-190	<LOQ	<LOQ	<LOQ	<LOQ	<LOQ
BDE-209	917.061	726.179	693.016	467.526	407.618

## Sheet: Stars(S)
	SST1	SST2	SST7	SST9	SST11	SST10
BDE-17	<LOQ	<LOQ	<LOQ	<LOQ	<LOQ	<LOQ
BDE-28	<LOQ	<LOQ	<LOQ	<LOQ	<LOQ	<LOQ
BDE-75	<LOQ	<LOQ	<LOQ	<LOQ	<LOQ	<LOQ
BDE-49	<LOQ	<LOQ	<LOQ	<LOQ	<LOQ	<LOQ
BDE-71	<LOQ	<LOQ	<LOQ	<LOQ	<LOQ	<LOQ
BDE-47	<LOQ	<LOQ	<LOQ	<LOQ	<LOQ	<LOQ
BDE-66	<LOQ	<LOQ	<LOQ	<LOQ	<LOQ	<LOQ
BDE-77	<LOQ	<LOQ	<LOQ	<LOQ	<LOQ	<LOQ
BDE-100	<LOQ	<LOQ	<LOQ	<LOQ	<LOQ	<LOQ
BDE-119	<LOQ	<LOQ	<LOQ	<LOQ	<LOQ	<LOQ
BDE-99	<LOQ	<LOQ	<LOQ	<LOQ	<LOQ	<LOQ
BDE-85	<LOQ	<LOQ	<LOQ	<LOQ	<LOQ	<LOQ
BDE-154	<LOQ	<LOQ	<LOQ	<LOQ	<LOQ	<LOQ
BDE-153	<LOQ	<LOQ	<LOQ	<LOQ	146.584	<LOQ
BDE-138	<LOQ	<LOQ	<LOQ	28.0366	<LOQ	<LOQ
BDE-183	<LOQ	<LOQ	<LOQ	38.2916	<LOQ	<LOQ
BDE-190	<LOQ	<LOQ	<LOQ	<LOQ	<LOQ	<LOQ
BDE-209	208.694	1.06934e+06	<LOQ	<LOQ	2491.05	1743.99

## Sheet: Urchins
	SU2	SU3	SU2	SU4	SU5	SU5	SU4	SU1
BDE-17	<LOQ	<LOQ	<LOQ	<LOQ	<LOQ	<LOQ	<LOQ	<LOQ
BDE-28	<LOQ	<LOQ	<LOQ	139.981	168.384	<LOQ	<LOQ	39.7988
BDE-75	<LOQ	<LOQ	<LOQ	<LOQ	<LOQ	<LOQ	<LOQ	<LOQ
BDE-49	<LOQ	<LOQ	<LOQ	161.883	279.849	375.18	<LOQ	80.2594
BDE-71	<LOQ	<LOQ	<LOQ	<LOQ	<LOQ	<LOQ	<LOQ	<LOQ
BDE-47	<LOQ	<LOQ	<LOQ	1024.36	792.672	1010.29	<LOQ	385.539
BDE-66	<LOQ	<LOQ	<LOQ	<LOQ	<LOQ	<LOQ	<LOQ	<LOQ
BDE-77	<LOQ	<LOQ	<LOQ	<LOQ	<LOQ	<LOQ	<LOQ	<LOQ
BDE-100	<LOQ	<LOQ	<LOQ	151.863	204.566	<LOQ	<LOQ	<LOQ
BDE-119	<LOQ	<LOQ	<LOQ	<LOQ	<LOQ	<LOQ	<LOQ	<LOQ
BDE-99	<LOQ	<LOQ	<LOQ	<LOQ	<LOQ	<LOQ	<LOQ	<LOQ
BDE-85	<LOQ	<LOQ	<LOQ	<LOQ	103.898	<LOQ	<LOQ	<LOQ
BDE-154	<LOQ	<LOQ	<LOQ	193.037	184.797	172.206	270.808	<LOQ
BDE-153	<LOQ	<LOQ	<LOQ	47.4823	<LOQ	253.36	<LOQ	<LOQ
BDE-138	<LOQ	<LOQ	<LOQ	75.142	145.349	<LOQ	<LOQ	<LOQ
BDE-183	<LOQ	<LOQ	<LOQ	110.641	<LOQ	212.9	<LOQ	32.5298
BDE-190	<LOQ	<LOQ	<LOQ	<LOQ	<LOQ	164.661	<LOQ	11.4939
BDE-209	<LOQ	<LOQ	<LOQ	7468.4	4310.92	1513.75	2911.87	470.956

## Sheet: Limpets
	SL4	SL5	SL6	SL9	SL9	SL8	SL7	SL6	SL3	SL5	SL4
BDE-17	183.609	86.3561	171.714	<LOQ	0.0208759	0.0461601	0.0202977	0.0212895	<LOQ	<LOQ	<LOQ
BDE-28	<LOQ	<LOQ	286.114	<LOQ	<LOQ	<LOQ	<LOQ	<LOQ	<LOQ	<LOQ	<LOQ
BDE-75	<LOQ	<LOQ	294.235	<LOQ	<LOQ	557.762	<LOQ	<LOQ	54.0241	<LOQ	<LOQ
BDE-49	2460.29	698.517	2297.26	564.71	<LOQ	378.699	<LOQ	219.313	1060.62	35.9061	34.5955
BDE-71	<LOQ	<LOQ	<LOQ	<LOQ	1083.15	1299.39	1832.09	1724.99	<LOQ	40.374	39.1078
BDE-47	<LOQ	<LOQ	1588.11	558.989	<LOQ	364.97	<LOQ	<LOQ	273.818	<LOQ	<LOQ
BDE-66	<LOQ	<LOQ	<LOQ	<LOQ	1272.33	1450.12	<LOQ	<LOQ	<LOQ	<LOQ	<LOQ
BDE-77	<LOQ	<LOQ	<LOQ	<LOQ	<LOQ	<LOQ	<LOQ	<LOQ	<LOQ	<LOQ	<LOQ
BDE-100	<LOQ	<LOQ	<LOQ	127.481	<LOQ	<LOQ	<LOQ	<LOQ	<LOQ	<LOQ	<LOQ
BDE-119	<LOQ	<LOQ	<LOQ	<LOQ	<LOQ	<LOQ	<LOQ	<LOQ	192.366	16.4751	27.863
BDE-99	<LOQ	<LOQ	476.162	<LOQ	<LOQ	127.409	<LOQ	<LOQ	<LOQ	<LOQ	<LOQ
BDE-85	<LOQ	<LOQ	197.861	<LOQ	<LOQ	<LOQ	<LOQ	<LOQ	<LOQ	<LOQ	<LOQ
BDE-154	1523.65	284.005	1096.13	105.632	<LOQ	318.258	<LOQ	<LOQ	<LOQ	19.8708	29.4118
BDE-153	<LOQ	<LOQ	<LOQ	<LOQ	<LOQ	438.746	301.783	612.844	<LOQ	<LOQ	<LOQ
BDE-138	<LOQ	<LOQ	162.522	<LOQ	346.649	621.461	<LOQ	195.229	<LOQ	<LOQ	<LOQ
BDE-183	<LOQ	<LOQ	256.77	89.4746	449.463	516.883	<LOQ	<LOQ	<LOQ	<LOQ	<LOQ
BDE-190	<LOQ	<LOQ	<LOQ	<LOQ	<LOQ	509.12	<LOQ	<LOQ	<LOQ	<LOQ	<LOQ
BDE-209	21998.1	6229.98	42517.7	2406.46	2119.82	2394.23	1493.63	5549.76	2809.22	313.289	249.969

## Sheet: no BDE209
	The figure below shows the median of the sum of concentrations of PBDEs across the species (pg/g Lw) without BDE-209 with the SD error bars in black. The plots with the same grey letter indicate no statistically significant differences.
